1 **Non-Communicable Diseases Risk Factors and the Risk of COVID-19 Infection among**  
2 **University Employees in Indonesia**

3 Authors:

4 Indah Suci Widyahening,<sup>1,2</sup> Dhanasari Vidiawati,<sup>1</sup> Trevino A Pakasi,<sup>1</sup> Pradana Soewondo,<sup>3</sup>  
5 Abdillah Ahsan<sup>4</sup>

6 Institutions:

7 <sup>1</sup>Department of Community Medicine, Faculty of Medicine, Universitas Indonesia

8 <sup>2</sup>Southeast Asian Ministers of Education Organization - Regional Centre for Food and  
9 Nutrition (SEAMEO-RECFON) - Pusat Kajian Gizi Regional (PKGR), Universitas Indonesia,  
10 Jakarta, Indonesia

11 <sup>3</sup>Department of Internal Medicine, Faculty of Medicine, Universitas Indonesia – Cipto  
12 Mangunkusumo Hospital

13 <sup>4</sup>Department of Economic, Faculty of Economic and Business, Universitas Indonesia

14 Corresponding author:

15 Indah Suci Widyahening, MD, MSc-CMFM, PhD

16 Department of Community Medicine, Faculty of Medicine Universitas Indonesia,

17 Jalan Pegangsaan Timur No. 16, Jakarta 10430

18 Mobile phone: +62 811911727, e-mail: [indah\\_widyahening@ui.ac.id](mailto:indah_widyahening@ui.ac.id)

19 Short title: Non-Communicable Diseases Risk Factors and COVID-19 Infection among  
20 University Employees

21 Article type: Research article

22 Abstract count: 280 words [max. 500]

23 Word count: 3198 words

24 References: 35

25 Figures/Tables: 0/4

26 **Abstract**

27 **Introduction** Non-communicable diseases (NCDs) are still a major public health problem in  
28 Indonesia. Studies have shown that risk factors of NCDs were associated with coronavirus  
29 disease 2019 (COVID-19) severity and mortality. However, it is unclear whether NCD risk  
30 factors are also risks for new COVID-19 infection. This study aimed to obtain the NCD risk  
31 profiles among university's employees and its association with COVID-19 infection.

32 **Methods** A cross-sectional study was conducted in October 2021. Participants were  
33 administrative employees of Universitas Indonesia (UI), Depok City, West Java. Assessment  
34 of NCDs risk factors was based on the World Health Organization STEPwise approach to NCD  
35 risk factor surveillance (WHO STEPS). Demographics, working and medical history data were  
36 obtained electronically by using a Google Form. Physical and laboratory examination were  
37 done in the Integrated Post for NCDs. Risks were expressed as adjusted odds ratio ( $OR_{adj}$ )  
38 and 95% confidence interval (CI) in multivariate analyses.

39 **Results** A total of 613 employees were enrolled. Men were predominant (54.8%) and about  
40 36% of them work in shift as security personnel. About 66.7% were overweight or obese  
41 and 77.8% had hypertension. There were 138 (22.8%) employees who had COVID-19  
42 infection. Nearly all (95.6%) have completed COVID-19 vaccination. At-risk waist  
43 circumference ( $OR_{adj}$  1.74, 95% CI 1.17-2.60,  $p=0.007$ ) and total cholesterol level of 200-239  
44 mg/dL ( $OR_{adj}$  2.24, 95% CI 1.15-4.33,  $p=0.017$ ) were independent risk factors, but shift work  
45 ( $OR_{adj}$  0.54, 95% CI 0.24-0.84,  $p=0.006$ ) was protective to COVID-19 infection.

46 **Conclusion** The prevalence of NCDs risk factors among university administrative employees  
47 was high, increasing the risk for COVID-19 infection. A behavioral intervention program to  
48 manage the NCD risk factors at the university level is urgently needed according to the  
49 Health Promoting University framework.

50 **Key words:** coronavirus disease 2019 (COVID-19), Health Promoting University, non-  
51 communicable diseases, risk factors, obesity

52

53

54

## 55 INTRODUCTION

56 The coronavirus disease 2019 (COVID-19) pandemic caused by the severe acute respiratory  
57 syndrome coronavirus 2 (SARS-CoV-2) is still ongoing and possibly become endemic.  
58 Currently, community transmission of COVID-19 in Indonesia has remained at low level after  
59 a second dramatic peak in mid-July 2021.[1] However, the actual number of cases may be  
60 higher than the officially registered; the weighted estimate of seroprevalence of SARS-CoV-2  
61 antibody in Jakarta in March 2021 was 44.5%. This implies that almost half of the population  
62 has been infected with SARS-CoV-2.[2]

63 Non-communicable diseases (NCDs) are major health problems in the world. The national  
64 Basic Health Research in 2018 has shown increasing prevalence of NCDs in Indonesia, such  
65 as diabetes (from 6.9% in 2013 to 10.9% in 2018) and hypertension (from 25.8% in 2013 to  
66 34.1% in 2018).[3] During the early COVID-19 pandemic, patients needing intensive care unit  
67 were more likely to have NCDs as comorbidities (hypertension, diabetes, cardiovascular  
68 disease, and cerebrovascular disease).[4]

69 The association of NCD risk factors and COVID-19 infection is not clear. Previous data  
70 showed that body mass index (BMI) and obesity are associated with COVID-19 infection,  
71 hospitalization and mortality.[5,6] Obesity seems play an important role in the pathogenesis  
72 of COVID-19.[7] Multimorbidity, especially renal, cardiovascular and metabolic morbidities,  
73 is associated with a higher risk of COVID-19 positive test.[8,9]

74 To prevent new infections in the future, we need to identify the modifiable risk factors for  
75 COVID-19, such as obesity and/or components of metabolic syndrome. This is important  
76 because factors that can be modified to reduce risk will be the target for health education  
77 along with rigorous vaccination program. This study aimed to obtain the NCD risk profiles  
78 among university's employees and its association with COVID-19 infection.

## 79 METHODS

### 80 *Study design and participants*

81 The design of this study was cross-sectional and conducted in October 2021. Participants  
82 were employees of the University Central Administration, Universitas Indonesia (UI) and the  
83 administrative/supporting staffs of the Faculty Medicine of the university. Demographics,

84 working and medical history data were obtained electronically by using a Google Form,  
85 which was distributed through the WhatsApp group of the Directorate of Human Resources  
86 and the Faculty of Medicine. Participants were then invited to attend physical and  
87 laboratory examination in the Integrated Post for NCDs throughout Universitas Indonesia at  
88 main campus at Depok City, West Java and the Salemba campus at Jakarta (total 6 posts).  
89 This post was a community-based program oriented towards promotive and preventive  
90 efforts to control NCDs.[10]

91 Sample size was calculated using the formula for a prevalence study with the confidence  
92 level of 0.05 and a precision of 5%. Hence a minimal number of 384 subjects is expected.  
93 Participants were enrolled in this study if they agree to give written consent. Ethics approval  
94 was granted from the Health Research Ethic Committee of the Faculty of Medicine  
95 Universitas Indonesia – Cipto Mangunkusumo Hospital (No. KET-  
96 1006/UN2.F1/ETIK/PPM.00.02/2021). Written informed consent was requested from all  
97 participants prior to the study.

#### 98 *History of COVID-19 infection and vaccination*

99 Diagnosis of COVID-19 was established by a history of positive PCR or rapid detection test  
100 for SARS-CoV-2 from nasopharyngeal swabs. However, participants might choose not to  
101 reveal their test results. History of COVID-19 infection was counted once between March  
102 2020 and October 2021; re-infection, if occurred, was not considered. Participants were also  
103 asked whether or not they were hospitalized from COVID-19.

104 COVID-19 vaccination was started in January 2021 (in UI Hospital) and in mid-2021, most  
105 non-medical university employees have been scheduled for two doses.

#### 106 *Assessment of non-communicable diseases risk factors*

107 Assessment was based on the World Health Organization STEPwise approach to NCD risk  
108 factor surveillance (STEPS).[11] The survey instrument includes: tobacco use, alcohol use,  
109 physical inactivity, unhealthy diet, and key biological risk factors: overweight and obesity,  
110 raised blood pressure, raised blood glucose, and abnormal blood lipids. Risk factors  
111 assessed in this study consisted of anthropometric measurements (body mass index and  
112 waist circumference), medical history (hypertension, diabetes, dyslipidemia), working

113 pattern (shift or non-shift), behavioral risk factors (smoking, alcohol drinking, fruit,  
114 vegetable, and salt consumption, and physical activity), and blood chemistry results (fasting  
115 blood glucose; triglyceride; total, low-density lipoprotein (LDL), and high-density lipoprotein  
116 (HDL) cholesterol levels.

117 Body weight was measured using a weight scale (SECA, Hamburg, Germany), and body  
118 height was measured by using a microtoise. The BMI was calculated as body weight in  
119 kilogram (kg) divided by body height in meter squared. Nutritional status was then classified  
120 based on the BMI criteria for Asian population as follows: underweight (BMI <18.5 kg/m<sup>2</sup>),  
121 normal weight (18.5–22.9 kg/m<sup>2</sup>), overweight (23.0–24.9 kg/m<sup>2</sup>), obesity class I (25.0–29.9  
122 kg/m<sup>2</sup>), and obesity class II (>30.0 kg/m<sup>2</sup>).[12] Waist circumference (WC) was measured  
123 using a measuring type. At-risk WC was >102 cm for men and >88 cm for women.

124 Systolic and diastolic blood pressures (BP) were measured using a digital blood pressure  
125 monitor. Hypertension was indicated if systolic BP was  $\geq 130$  mmHg and/or diastolic BP  $\geq 85$   
126 mmHg. A minimum of 8 hours fasting was required for the measurement of fasting blood  
127 glucose (FBG), triglyceride (TG) and cholesterol levels. The result was indicated as high if  
128 FBG  $\geq 110$  mg/dL, TG  $\geq 150$  mg/dL, total cholesterol  $\geq 200$  mg/dL, LDL-cholesterol  $\geq 100$   
129 mg/dL, while HDL-cholesterol was considered low if  $\leq 40$  mg/dL. Physical activity was  
130 considered low (inactive) if less than 10 minutes and less than 2 times per week.

### 131 *Statistical analyses*

132 Baseline characteristics of the participants and risk factors were presented descriptively.  
133 Univariate logistic regression test was performed for each risk factor. Multivariate logistic  
134 regression analyses were done to estimate the adjusted odds ratio (OR<sub>adj</sub>) and its  
135 corresponding 95% confidence intervals (CIs) for the association between risk factor and  
136 COVID-19 infection. A p-value of less than 0.05 was considered significant. All statistical  
137 analyses were done using Statistical Package for Social Science (SPSS) version 20.

## 138 **RESULTS**

### 139 *Characteristics of the study subjects*

140 From 789 supporting staffs invited, 750 attended the examination, 618 completed the  
141 questionnaire and 5 did not undergo laboratory tests. Totally, 613 (77.7%) data were finally

142 included for analyses. Table 1 shows the characteristics and health history of the university  
143 employees. Male participants were predominant (54.8%). Around 79.7% of them were 40  
144 years old or less and 72.4% were married. About 36% (222 of 613) work in shift as security  
145 personnel. There were 138 (22.8%) employees who had a history of positive COVID-19 but  
146 only 14 (2.3%) who need to be hospitalized. Nearly all of the participants (95.6%) have  
147 completed COVID-19 vaccination.

148

149 Table 1. Characteristics and health history of the university employees (n=613)

| <b>Variables</b>                    | <b>n (%)</b> |
|-------------------------------------|--------------|
| Age; mean (SD): 34.81 (15.10)       |              |
| ≤ 40 years                          | 483 (79.7)   |
| > 40 years                          | 123 (20.3)   |
| Sex                                 |              |
| Male                                | 336 (54,8)   |
| Female                              | 277 (45,2)   |
| Marriage status                     |              |
| Married                             | 444 (72.4)   |
| Un-married                          | 169 (27.6)   |
| Working in shift                    |              |
| Yes                                 | 222 (36.2)   |
| No                                  | 391 (63.8)   |
| History of hypertension             |              |
| Yes                                 | 143 (23.6)   |
| No                                  | 462 (75.4)   |
| History of diabetes                 |              |
| Yes                                 | 21 (3.4)     |
| No                                  | 584 (96.6)   |
| History of dyslipidemia             |              |
| Yes                                 | 103 (16.8)   |
| No                                  | 501 (83.2)   |
| History of COVID-19 infection       |              |
| Yes                                 | 138 (22.8)   |
| No                                  | 467 (77.2)   |
| History of COVID 19 hospitalization |              |
| Yes                                 | 14 (2.3)     |
| No                                  | 592 (97.7)   |
| COVID 19 vaccination                |              |
| Complete                            | 576 (95.6)   |
| In-complete                         | 17 (2.8)     |
| None                                | 10 (1.6)     |

150

151 Table 2 shows the distribution of behavioral risk factors for NCDs among the university  
152 employees. Proportion of those who currently smoking is near to 25% (151 of 613) and 15%  
153 (94 of 613) admitted consuming alcohol. Proportion of those who consume fruit 5-7 days a  
154 week was just below 20% (120 of 613), while for vegetable consumption it is also not  
155 reaching 50% (285 of 613). Majority of the respondents (80%) are categorized as having an  
156 active physical activity level.

157

158 Table 2. Behavioral risk factors for non-communicable diseases among university employees  
159 (n=613)

| Variable                     | n (%)      |
|------------------------------|------------|
| Current smoking              |            |
| Yes                          | 151 (24.6) |
| No                           | 462 (75.4) |
| Alcohol consumption          |            |
| Yes                          | 94 (15.2)  |
| No                           | 524 (84.8) |
| Fruit consumption            |            |
| Never                        | 12 (2.0)   |
| 1-4 days/week                | 483 (78.5) |
| 5-7 days/week                | 120 (19.5) |
| Vegetable consumption        |            |
| Never                        | 5 (0.8)    |
| 1-4 days/week                | 325 (52.8) |
| 5-7 days/week                | 286 (46.4) |
| Salt consumption             |            |
| Far too much or too much     | 114 (18.5) |
| Just the right amount        | 314 (51.0) |
| Too little or far too little | 114 (18.5) |
| Don't know                   | 74 (12.0)  |
| Physical activity level      |            |
| Inactive                     | 119 (19.4) |
| Active                       | 494 (80.6) |

160

161 Table 3 shows biological risk factors for NCDs among the university employees. Two third of  
162 them (409 of 613) are categorized as overweight and obese, more than 75% (477 of 613)  
163 have an increased blood pressure, half (320 of 613) are having an at-risk waist  
164 circumference and almost half (294 of 613) are having an increased fasting blood sugar.

165 Table 3. Biological risk factors for non-communicable diseases among university employees  
 166 (n=613)

| Variable                               | n (%)      |
|----------------------------------------|------------|
| BMI (kg/m <sup>2</sup> )               |            |
| Underweight (<18.5)                    | 32 (5.2)   |
| Normoweight (18.5-22.9)                | 172 (28.1) |
| Overweight (23-24.9)                   | 106 (17.3) |
| Obese I (25-29.9)                      | 200 (32.6) |
| Obese II (>30)                         | 103 (16.8) |
| Waist circumference (cm)               |            |
| Normal (male ≤90, female ≤80)          | 298 (48.2) |
| At risk (male >90, female >80)         | 320 (51.8) |
| Systolic blood pressure (mmHg)         |            |
| <120                                   | 195 (31.8) |
| 120-139                                | 286 (46.7) |
| ≥140                                   | 132 (21.5) |
| Diastolic blood pressure (mmHg)        |            |
| <80                                    | 221 (36.1) |
| 80-89                                  | 234 (38.2) |
| ≥90                                    | 158 (25.8) |
| Blood pressure (mmHg)                  |            |
| systolic <120 and diastolic <80        | 136 (22.2) |
| systolic 120-139 OR diastolic 80-89    | 281 (45.8) |
| systolic ≥140 OR diastolic ≥90 OR both | 196 (32.0) |
| Fasting blood glucose (mg/dL)          |            |
| <100                                   | 319 (52.0) |
| 100-125                                | 244 (39.8) |
| ≥126                                   | 50 (8.2)   |
| Total cholesterol level (mg/dL)        |            |
| <200                                   | 561 (91.5) |
| 200-239                                | 42 (6.9)   |
| ≥240                                   | 10 (1.6)   |
| LDL-cholesterol level (mg/dL)          |            |
| <100                                   | 488 (79.6) |
| 100-129                                | 102 (16.6) |
| ≥130                                   | 23 (3.8)   |
| HDL-cholesterol level (mg/dL)          |            |
| >40                                    | 484 (79.0) |
| ≤40                                    | 129 (21.0) |
| Triglyceride level (mg/dL)             |            |
| <150                                   | 569 (92.8) |
| 150-199                                | 32 (5.1)   |
| ≥200                                   | 12 (2.0)   |

167



168 Table 4 shows variables that have moderate relationship ( $p < 0.2$ ) during bivariate analysis  
 169 with the history of COVID 19 infection. Shift work (Adjusted OR [ $OR_{adj}$ ] 0.54, 95% Confidence  
 170 Interval [CI] 0.24-0.84,  $p = 0.006$ ) having at risk waist circumference ( $OR_{adj}$  1.74, 95% CI 1.17-  
 171 2.60,  $p = 0.007$ ), and total cholesterol level of 200-239 mg/dl ( $OR_{adj}$  2.24, 95% CI 1.15-4.33,  
 172  $p = 0.017$ ) are variables that have significant relationship with history of COVID-19 infection  
 173 during multivariate logistic regression.

174

175 Table 4. Risk factors of COVID 19 infection among university employees (n=613)

| Variables                                       | OR   | 95% CI     | $p^*$        | $OR_{adj}$ | 95% CI     | $p^\dagger$  |
|-------------------------------------------------|------|------------|--------------|------------|------------|--------------|
| Working in shift                                |      |            |              |            |            |              |
| No                                              | Ref  |            |              | Ref        |            |              |
| Yes                                             | 0.50 | 0.32-0.77  | <b>0.010</b> | 0.54       | 0.35-0.84  | <b>0.006</b> |
| Smoking                                         |      |            |              |            |            |              |
| No                                              | Ref  |            |              | Ref        |            |              |
| Yes                                             | 0.51 | 0.31-0.84  | <b>0.007</b> | 0.701      | 0.40-1.23  | 0.214        |
| Fruit consumption                               |      |            |              |            |            |              |
| 5-7 days/week                                   | Ref  |            |              | Ref        |            |              |
| 1-4 days/week                                   | 0.67 | 0.43-1.06  | 0.086        | 0.82       | 0.51-1.32  | 0.408        |
| Never                                           | 0.22 | 0.03-1.79  | 0.157        | 0.31       | 0.04-2.52  | 0.271        |
| Salt consumption                                |      |            |              |            |            |              |
| Just the right amount/too little/far too little | Ref  |            |              | Ref        |            |              |
| Far too much/too much/don't know                | 0.63 | 0.83-0.99  | <b>0.037</b> | 0.68       | 0.43-1.06  | 0.088        |
| BMI ( $kg/m^2$ )                                |      |            |              |            |            |              |
| <23                                             | Ref  |            |              | Ref        |            |              |
| 23-24.9                                         | 1.19 | 0.66-2.16  | 0.559        | 0.94       | 0.49-1.80  | 0.856        |
| $\geq 25$                                       | 1.66 | 2.07-2.59  | <b>0.024</b> | 1.10       | 0.59-2.04  | 0.767        |
| Waist circumference (cm)                        |      |            |              |            |            |              |
| Normal (male $\leq 90$ , female $\leq 80$ )     | Ref  |            |              | Ref        |            |              |
| At risk (male $> 90$ , female $> 80$ )          | 1.81 | 1.23-2.68  | <b>0.003</b> | 1.74       | 1.17-2.60  | <b>0.007</b> |
| Total Cholesterol (mg/dl)                       |      |            |              |            |            |              |
| <200                                            | Ref  |            |              | Ref        |            |              |
| 200-239                                         | 2.54 | 1.33-4.86  | <b>0.005</b> | 2.24       | 1.15-4.33  | <b>0.017</b> |
| $\geq 240$                                      | 2.99 | 0.79-11.30 | 0.107        | 2.85       | 0.73-11.13 | 0.131        |
| LDL (mg/dl)                                     |      |            |              |            |            |              |
| <100                                            | Ref  |            |              | Ref        |            |              |
| 100-129                                         | 1.17 | 0.70-1.94  | 0.547        | 0.77       | 0.41-1.45  | 0.425        |
| $\geq 130$                                      | 3.04 | 1.28-7.24  | <b>0.012</b> | 0.95       | 0.24-3.82  | 0.944        |

176 \* univariate logistic regression

177 † multivariate logistic regression

178

179

## 180 DISCUSSION

181 Our study showed that more than half of the university employees have at least one  
182 biological risk factor of NCDs (overweight or obese, increased blood pressure, at-risk waist  
183 circumference, and increased fasting blood sugar). Having at-risk waist circumference and  
184 total cholesterol level of 200-239 mg/dL increased the risk of COVID 19 infection while  
185 working in shift prevented it.

186 Assessing the NCD risk factors was our university commitment to protect health and  
187 promotes the well-being of the university members as part of the Health Promoting  
188 University framework.[13] It seems that NCD risk factors are common among university  
189 employees. A study in Saudi also found that more than half of the university employees had  
190 3 or more NCD risk, i.e., 64% were overweight or obese, 22.1% had hypertension, and 21.5%  
191 had diabetes.[14] Another study showed that 72% of the university employees and their  
192 families were overweight or obese.[15] In Nigeria, the most common risk factors among  
193 university employees were inadequate intake of fruit and vegetables (94.6%), physical  
194 inactivity (77.8%), and dyslipidemia (51.8%).[16]

195 In the early COVID-19 pandemic, obesity was identified as a significant risk factor for severe  
196 disease.[17,18] A population-based cohort study found that excess weight is an important  
197 modifiable risk factor for severe COVID-19 outcomes.[19] Meta-analyses confirmed that  
198 obesity is a risk factor for developing severe COVID-19 through several possible  
199 mechanisms.[20]

200 A large cohort study from a general population in UK found that modifiable risk factors for  
201 COVID-19 were higher BMI, higher glycated hemoglobin, smoking, slow walking pace (a  
202 proxy for physical fitness), and use of blood pressure medication (a proxy for hypertension).  
203 High level of HDL cholesterol was associated with lower risk. The authors then concluded  
204 that lifestyle modification might reduce the risk of COVID-19.[21] Further study found that  
205 higher total cholesterol and ApoB levels might increase the risk of COVID-19 infection.[22]

206 Many studies used BMI as an indicator of obesity, which means excessive body fat.  
207 However, higher BMI may not represent higher amount of body fat since it cannot  
208 distinguish between fat and lean body mass.[23] We found that high BMI did not have  
209 significant association with the incidence of COVID-19 but high waist circumference (WC)

210 did. If we look at our participants, about 30% of them work as security guards, implying that  
211 they may have higher BMI due to higher muscle mass. Therefore, WC is a better indicator  
212 for excessive body fat since it directly indicates the abdominal or central obesity.

213 Clinical studies on abdominal obesity and COVID-19 are still evolving. A study found that  
214 abdominal obesity was associated with a high chest x-ray severity score better than  
215 BMI.[24] UK study found that high WC was associated with positive COVID-19 test only in  
216 people  $\geq 65$  years, independent of BMI.[25] Another study found a positive association  
217 between WC and COVID-19 susceptibility (OR = 1.38; 95% CI: 1.07–1.78;  $p=0.015$ ).  
218 However, the significance was lost after adjustment for BMI. The authors concluded that  
219 overall obesity has a causal impact on the susceptibility of COVID-19 and obese people are  
220 regarded as high-risk.[26]

221 The ACE2 receptor plays an important role for SARS-COV-2 infectivity as the virus use the  
222 receptor to attach to the cell surface.[27] ACE2 is widely expressed in fat and may be the  
223 reason why obese patients experience more severe COVID-19 patients.[28] A recent study  
224 found that the expression of ACE2 in fat tissue (both visceral and subcutaneous) is higher  
225 than in lung tissue.[29] Upon binding to the cell surface, SARS-CoV-2 may enter the cell  
226 through clathrin-mediated endocytosis of the cell membrane.[30] Human cell membrane is  
227 made from cholesterol, a key structural lipid that is often used by pathogens for their  
228 pathogenesis.[31] Therefore, higher membrane cholesterol provides higher efficiency of the  
229 virus entry. However, COVID-19 patients generally showed reduced total cholesterol, HDL,  
230 and LDL-cholesterol levels which were associated with disease severity.[32] Systematic  
231 review confirmed that lower total, HDL- and LDL-cholesterol levels were significantly  
232 associated with COVID-19 severity and mortality, but not triglyceride level.<sup>33</sup>

233 On the contrary of other studies, working in shift was a protective factor for COVID-19  
234 infection. For instance, a study in UK found that shift work was associated with increased  
235 risk of COVID-19.[34] More detail analyses showed that shift work was associated with a  
236 higher likelihood of COVID-19 for both irregular (OR 2.42; 95% CI 1.92–3.05) and permanent  
237 shift work (OR 2.50; 95% CI 1.95–3.19).[35]

241 There were several limitations in this study. First, the design was not prospective and  
242 included only people who survived COVID-19. Secondly, we cannot differentiate whether

243 the participants had COVID-19 infection before or after vaccination, and most of the  
244 employees completed their vaccination about three months before our data collection.  
245 Therefore, the effect of the COVID-19 vaccine on the incidence was not known. Universitas  
246 Indonesia is one of the most prominent universities in Indonesia, located in an area where  
247 the prevalence of NCDs and COVID-19 is the highest in the country. Hence the prevalence  
248 of COVID-19 infection and NCD risk factors reported in this study might also be higher than  
249 other university employees in Indonesia.

250

## 251 **CONCLUSION**

252 University administrative employees have a substantially high prevalence of NCD risk factors  
253 and this has increased their risk for COVID-19 infection. A behavioral intervention program  
254 to manage the NCD risk factors at the university level is urgently needed according to the  
255 Health Promoting University framework.

256

## 257 **ACKNOWLEDGEMENTS**

258 The authors would like to express their gratitude to the Director of Human Resources of  
259 Universitas Indonesia and the Dean Office of the Faculty of Medicine Universitas Indonesia  
260 for their support during data collection. The authors also thank the Makara Satellite Clinic  
261 of Universitas Indonesia for their assistance in the physical and laboratory examination of  
262 the subjects. Likewise, the authors are thankful for the assistance of Firky Ditha Saputri, MD  
263 and Helisa Rachel, MD during data collection and analysis.

264

## 265 References

1. World Health Organization. Indonesia Situation Report – 81. Available at: [https://cdn.who.int/media/docs/default-source/searo/indonesia/covid19/external-situation-report-81\\_17-november-2021.pdf?sfvrsn=9edbe641\\_5](https://cdn.who.int/media/docs/default-source/searo/indonesia/covid19/external-situation-report-81_17-november-2021.pdf?sfvrsn=9edbe641_5).
2. Ariawan I, Jusril H, Farid MN, Riono P, Wahyuningsih W, Widyastuti, et al. SARS-CoV-2 antibody seroprevalence in Jakarta, Indonesia: March 2021. Available at SSRN: <https://ssrn.com/abstract=3954041>.
3. Ministry of Health (MoH), Republic of Indonesia. National Institute of Health Research and Development. Basic Health Research 2018. Jakarta: MoH, 2018.
4. Wang D, Hu B, Hu C, Zhu F, Liu X, Zhang J, et al. Clinical characteristics of 138 hospitalized patients with 2019 novel Coronavirus-infected pneumonia in Wuhan, China. *JAMA*. 2020;323:1061–9.
5. Tartof SY, Qian L, Hong V, Wei R, Nadjafi RF, Fischer H, et al. Obesity and mortality among patients diagnosed with COVID-19: results from an integrated health care organization. *Ann Intern Med*. 2020;173(10):773–81. <https://doi.org/10.7326/M20-3742>.
6. Hendren NS, de Lemos JA, Ayers C, Das SR, Rao A, Carter S, et al. Association of body mass index and age With morbidity and mortality in patients hospitalized with COVID-19: Results from the American Heart Association COVID-19 Cardiovascular Disease Registry. *Circulation*. 2021; 143(2):135–44. <https://doi.org/10.1161/CIRCULATIONAHA.120.051936>.
7. Kassir R. Risk of COVID-19 for patients with obesity. *Obes Rev*. 2020;21(6):e13034. <https://doi.org/10.1111/obr.13034>.
8. McQueenie R, Foster HME, Jani BD, et al. Multimorbidity, polypharmacy, and COVID-19 infection within the UK Biobank cohort. *PLoS One* 2020;15:e0238091.
9. Woolford SJ, D'Angelo S, Curtis EM, Parsons, CM, Ward KA, Dennison EM, et al. COVID-19 and associations with frailty and multimorbidity: a prospective analysis of UK Biobank participants. *Aging Clin Exp Res* 2020;32:1897–1905. doi:10.1007/s40520-020-01653-6.
10. Tri Siswati T, Margono, Husmarini N, Purnamaningrum YE, Bunga Atria Paramashanti BA. Health-promoting university: the implementation of an integrated guidance post for non-communicable diseases (Posbindu PTM) among university employees. *Global Health Promotion*. 2021 (accepted article). <https://doi.org/10.1177/17579759211021363>.
11. World Health Organization. STEPwise Approach to NCD Risk Factor Surveillance (STEPS). Available at: <https://www.who.int/teams/noncommunicable-diseases/surveillance/systems-tools/steps>.
12. World Health Organization. Regional Office for the Western Pacific. The Asia-Pacific perspective: redefining obesity and its treatment. Sydney, Australia: Health Communications Australia, 2000.
13. Mónica Suárez-Reyes M, Van den Broucke S. Implementing the Health Promoting University approach in culturally different contexts: a systematic review. *Global Health Prom*. 2016; 23 Supp. 1: 46–56.
14. Amin TT, Al Sultan AI, Mostafa OA, Darwish AA, Al-Naboli MR. Profile of Non-Communicable Disease Risk Factors Among Employees at a Saudi University. *Asian Pac J Cancer Prev*. 2014;15 (18):7897–7. <http://dx.doi.org/10.7314/APJCP.2014.15.18.7897>.

15. Alzeidan R, Rabiee F, Mandil A, Hersi A, Fayed A. Non-communicable disease risk factors among employees and their families of a Saudi university: An epidemiological study. *PLoS ONE*. 2016;11(11): e0165036. <https://doi.org/10.1371/journal.pone.0165036>.
16. Agaba EI, Akanbi MO, Agaba PA, Ocheke AN, Gimba ZM, Daniyam S, et al. A survey of non-communicable diseases and their risk factors among university employees: a single institutional study. *Cardiovasc J Afr* 2017; 28: 377–84.
17. Földi M, Farkas N, Kiss S, et al. Obesity is a risk factor for developing critical condition in COVID-19 patients: a systematic review and meta-analysis. *Obes Rev* 2020; 21: e13095.
18. Huang Y, Lu Y, Huang Y-M, et al. Obesity in patients with COVID-19: a systematic review and meta-analysis. *Metabolism* 2020; 113: 154378.
19. Gao M, Piernas C, Astbury NM, Hippisley-Cox J, O’Rahilly S, Aveyard P, et al. Associations between body-mass index and COVID-19 severity in 6.9 million people in England: a prospective, community-based, cohort study. *Lancet Diabetes Endocrinol* 2021; 9: 350–9. [https://doi.org/10.1016/S2213-8587\(21\)00089-9](https://doi.org/10.1016/S2213-8587(21)00089-9).
20. Aghili SMM, Ebrahimpur M, Arjmand B, Shadman Z, Pejman Sani M, Qorbani M, et al. Obesity in COVID-19 era, implications for mechanisms, comorbidities, and prognosis: a review and meta-analysis. *Int J Obes (Lond)*. 2021;45(5):998–1016. <https://doi.org/10.1038/s41366-021-00776-8>.
21. Ho FK, Celis-Morales CA, Gray SR, Katiireddi SV, Niedzwiedz CL, Hastie C, et al. Modifiable and non-modifiable risk factors for COVID-19, and comparison to risk factors for influenza and pneumonia: results from a UK Biobank prospective cohort study. *BMJ Open* 2020;10(11):e040402. <https://doi.org/10.1136/bmjopen-2020-040402>.
22. Zhang K, Dong S-S, Guo Y, Tang S-H, Wu H, Yao S, et al. Causal associations between blood lipids and COVID-19 risk: A two-sample Mendelian randomization study. *Arterioscl Thromb Vasc Biol*. 2021;41:2802–10. <https://doi.org/10.1161/ATVBAHA.121.316324>
23. Okorodudu DO, Jumean MF, Montori VM, Romero-Corral A, Somers VK, Erwin PJ et al (2010) Diagnostic performance of body mass index to identify obesity as defined by body adiposity: a systematic review and meta-analysis. *Int J Obes* 34:791–799. <https://doi.org/10.1038/ijo.2010.5>.
24. Malavazos AE, Secchi F, Basilico S, Capitanio G, Boveri S, Milani V, et al. Abdominal obesity phenotype is associated with COVID-19 chest X-ray severity score better than BMI-based obesity. *Eat Weight Disord*. 2021. <https://doi.org/10.1007/s40519-021-01173-w>.
25. Christensen RAG, Sturrock SL, Arneja J, Brooks JD. Measures of adiposity and risk of testing positive for SARS-CoV-2 in the UK Biobank Study. *J Obesity*. 2021;2021:8837319. <https://doi.org/10.1155/2021/8837319>.
26. Freuer D, Linseisen J, Meisinger M. Impact of body composition on COVID-19 susceptibility and severity: A two-sample multivariable Mendelian randomization study. *Metabolism*. 2021;118:154732. <https://doi.org/10.1016/j.metabol.2021.154732>.
27. Hoffmann M, Kleine-Weber H, Schroeder S, Krüger N, Herrler T, Erichsen S, et al. SARS-CoV-2 cell entry depends on ACE2 and TMPRSS2 and is blocked by a clinically proven protease inhibitor. *Cell*. 2020;181:271–80.
28. Al-Benna S. Association of high level gene expression of ACE2 in adipose tissue with mortality of COVID-19 infection in obese patients. *Obes Med*. 2020;19:100283. <https://doi.org/10.1016/j.obmed.2020.100283>.

- 
29. Jia X, Yin C, Lu S, Chen Y, Liu Q, Bai J, Lu Y. Two things about COVID-19 might need attention. Preprints 2020, 2020020315. <https://doi.org/10.20944/preprints202002.0315.v1>
  30. Bayati A, Kumar R, Francis V, McPherson PS. SARS-CoV-2 infects cells after viral entry via clathrin-mediated endocytosis. *J Biol Chem*. 2021;296: 100306. <https://doi.org/10.1016/j.jbc.2021.100306>.
  31. Dang EV, Madhani HD, Vance RE. Cholesterol in quarantine. *Nat Immunol*. 2020; 21(7):716-7.
  32. Kocar E, Rezen T, Rozman D. Cholesterol, lipoproteins, and COVID-19: Basic concepts and clinical applications. *Biochim Biophys Acta Mol Cell Biol Lipids*. 2021;1866:158849. <https://doi.org/10.1016/j.bbali.2020.158849>.
  33. Zinellu A, Panagiotis P, Fois AG, Solidoro P, Carru C, Mangoni AA. Cholesterol and triglyceride concentrations, COVID-19 severity, and mortality: A systematic review and meta-analysis with meta-regression. *Front Public Health*. 2021;9:1210. <https://doi.org/10.3389/fpubh.2021.705916>.
  34. Fatima Y, Bucks RS, Mamun AA, Skinner I, Rosenzweig I, Leschziner G, et al. Shift work is associated with increased risk of COVID-19: Findings from the UK Biobank cohort. *J Sleep Res*. 2021;30:e13326. <https://doi.org/10.1111/jsr.13326>.
  35. Maidstone R, Anderson SG, Ray DW, Rutter MK, Durrington HJ, Blaikley JF. Shift work is associated with positive COVID-19 status in hospitalised patients. *Thorax* 2021;76:601–6.
